# Supplementary material for: The Drosophila simulans Genome Lacks the crystal-Stellate System
Source: MDPI journal article supplement (doi:10.3390/cells11233725), 2022-11-22
Supplement: s1 [file s1]

***D. melanogaster***

Su(Ste)-specific 663 (663bp)

TCTAGATAGGGATGACGTGATTTTTTAACTCCACACAAAAGAAAGCAGAA  
ATGTTTGTCCGATATATTGTTGTTTCGCAATTAAACAGATTCCGCAGTGCG  
TTGATATGGCCAGCTACCACCTACTAATACACCTCATAACCTCTCCTCT  
AAATACTTGGTTCAAAGTGTTAGGGTCCAAGCTGGTCATATCAAGCACTC  
ATTTCGAGTACCATAGCATACTTTTCGTTAATAGTGGTCATAACCTGGGTA  
TAATAATAAAATTAATCAAATAAAACATTCAATTCAGTTTTTTATTTAAT  
TTTATGTTAAAAGAGTTCCAAAAAGTGCTTTCCTGACTACATCAAATATT  
TTTTGATAATTTAATTTCTTTAAATATACAAATTCTGTTTTAATGTATTA  
TAGGAGTGAGTAGAAGGTAAAAACATTATTTTCAATTTAAAAAAAATTA  
AAATTTTGATTCCATCATTTTTTATGTTATTCTTTTTGTAGAGTATTCAAT  
ACTGGCAACTTCGTATTTTAGTTTGATTTCCTCATGCTGTTTTTGGTTAAT  
TTCCAACGTACCAGATTGATTTCGATACGTAAATTTAAACGCACTTTATT  
GCCTTTTTGGAAGAACGTTGCTTCAAAACGGAAAATCGAAGGAAACCCTG  
ACCGGAGAATTC

cryme3 (386bp)

TTTCCAAAAGTGTTTTCTGACTACATCAAATATTTTTTGATAATTTAAT  
TTCTTTAAATATACAAATTCTGTTTTAATGTATTATAGGAGTGAGTAGAA  
GGTTAAACACTATTTTCAATTTAAAAAAAATTTAAATTTTGATTCCAT  
CATTTTTATGTAATTCTTTTTGTAGAGTATTCAATACTGGCAACTTCGTA  
TTTTAGTTTGATTTTCCATGCTGTTTTTGGGTAATTTCCAACATACCAGA  
TTGATTTTGCGCGTAAATTTAAACGCACTTTATTGCCTTTTTGGAAGAAC  
GTTGCTTCAAAACGGAAAATCGAAGGAAACCCTGACCGGACCTAAGGGAC  
AGCCTTGGGGGGAAAACTGGCAGTGCATTTGAATTC

***D. simulans***

F6.3 (471bp)

TCTAGAAGCTGCGACTCGATCCACGGCCGATACATTATGTCGAACGAGGC  
GTGGATAATATGCGCAAAAGTATGAGAGACGCGACTTCGAAGTGTGTCCA  
AAGCTCTCCTGTAGGCAGAAAGCCCTGCCTGTGGGCCCCAAGCGACGTGT  
GTGGCAAGTCCAAAGTGAAGATCTTCTGCCCTCGCTGTAAGGACTTTTAC  
GAGCTGCGATCCGATACACAGCTGGACGGAGCAATGTTTCGGGACCAGCTT  
CTCGCACAACTTCTTCGCGCAACTTCTTCGCGCAGCGGCCGACTGAGACC  
CCAGCCGCCCCCTGGAGGTCCACCGGTAAGTAATTCTATGAATTTAGTCCT  
GGTTCTTTTCTACACAAAGCGCTTGCATTTGCAGTCTATTTGGCTTCCTG  
TTTTTACGAGACGGCCTTGATGAAGCTCGAATCGCCCGAGTCCTCGCCCA  
AGAATATCGGATCGAGAATTC

crysi3 (380bp)

TTTCCAAAAGTGTTTTCTGACTTTACATTAAATATGTAATGATAATTTA  
ATTCCAAATTTAACAGTATTCTTTAAATATATAAACTGTATTATTTCGAG  
TAGGAGGTTAAAATATTACTTTCAATTTTTTAATAAAATTATAATTTTGAT  
TCAATCATTTTTTATGTAATTCATTTTGTAGAGTATTCAATACTGGCAACT  
TTGATATTGTTATTTTCCCACGATGTTTTTGGTTAATTTCCAACCTACCA

GATTGATTTTCGCGCGTAAATTTATGCGCACTTTATTGCCTTTTTTGAAGA  
ACGTTGCTTCAAAACGGAAAATCGAAGCAAACCTGACCGGACCTAAGGG  
ACAGCCTGGGGGAAACTGGCAGTGCATTT

F4C2 (1041bp)

GAATTCATAATAACATGAAAGATCTAATATTTTGTTCATTACTAGACTAAG  
AAAAATTGGAAAAAATATTAATAAAATAAATTGTAATTTATTTAATATAAC  
TGAGTTATAAATTTATTAATGAATTTAATGTAAACATTTTCCTTTGGAT  
ACTATTTATAAAATAATATAAAAACGCTGTGCTTGCCGCTTTGACGAGTT  
TGAGATTTTTGTAAAGGCCATTTCAGTACTCGACCGATTAAAGGGTTACGGC  
CCAAC TGATACATAGATGTCATTATGGCATA GTAGGCCTTGTCATTTTCGC  
ACTGTACTTTTTATTATTTTTTCATACGAGTAAACTGGCAACATGTCGAGC  
CCGTGAGTAACTAGATTTTTTCCCTATGGAAAAAATAGCAAATCACAGTAAA  
ATCTTGTAGCCAGAACAACAGCAGCTGGATCAGTTGGTTCCTCGGGATCA  
AGGGCAACGAGTACCTCTGCCGCATGCCCATCGACTTCATTCAGGAGACG  
TTCAAGATGGGCCTGGAGTACTTCACCGAGACACTGCAAGTGATACTGAA  
TCCGGGGTTTCGACAGTTCCCTTGACTGTGTCTTCGGCGATGAGGAGATAC  
GGCATGATCCACGCCCCGATACATTATGTTCGGAGCGAGGCGTGGATAATAT  
GCGCCAAAAGTATGAGAGACGCGACTTCGAAGTGTGTCCAAAGCTCTACT  
GTAGGCAGAAAGCCCTGCCTGTGGGCCCCAGCGACGTGTGTGGCAAGTCC  
AAGTGAANATCTTCTGCCCTCGCTGTAAGACTTTTACAAGCTGCGATCCG  
ATCACAGCTGGACGGAGCATATGTTTCGGGACCAGCTTCTCGCACAACTTC  
TTAGCGCAGTGGCCGAACCTTGAGACCCCAAGCCGCCACTGGACGTCCCCC  
GGTAAGTAATTCGCCGAATTTAGTCCCTTGTTCTTTTCTACACAAAGCGCT  
TGCATTTGCAGTCAATTTGGCTTCCGGTTTTTTATGAGACGGCCTTGATGA  
AGCTCGAATCGCCCGAGTCCTCGCCCAAGAATATCGGATCC

20F1 (775 bp)

CCATGGGTTCCTTTTAGCTCTTCCCGAAGCATTAAACAATTTAACAAAATA  
TCTGGAGGCACGAAGTGTTCGGACACAAGCACTCAACAATCACTTGCCTTA  
TTAATCTTCTTCACACGCCGCACGCTGAATACTCTAATGACTATTATTCT  
ACTATAAAGCTCATTTTTTAAAATTTATTTTGTGATATTATGATTCCGGCT  
TTTTCTATTTCTAAGCTATATGTAATAATATCAATGTAAAGGCAATGCAA  
AACAAGAATTTTTCACATGGTGCCAATCGATCAATAATAACATAGATTTT  
AAAGTCTAACACCTTCTAAGGTAAAGGGCATATTTTGTCAAATTTACAAT  
GCATGAGCATACGTGTGCACACATACAGTTGTTTGCTATCACTGTATGCG  
TAGAAAAGCGCTGCATTGCTGCAGCGCTCTCCGACCCTTTTCGGCGCTTG\*  
CAAAAAATCGTATGGCGTAACGCATCTTGTTATTCTAGTGTCTATGGCCA  
AACCAATGTATGTCCGTTACGCATCTTGTTATTCTAGTGTCTTTGGATGG  
ACGGAGCAATGTTTCGGGACCAGCTTCTCGCACAACTTCTTCGCGCAGCGG  
CCGAACCCCAGCCGCCCTTGACGTCCCCCGGTAAGTAGATTCTCCGAAT  
TTAGTCCTTGTTCTTTTCTACACAAAGGCGCTTGCAATTTGCAGTCTATTT  
GGCTTCCGGTTTTTACGAGACGGCCTTGATGAAGCTCGAATCGCCCGAGT  
CCGTGCCCCAAGAATCTCGGATCC

17F7 (920 bp)

GGTACCCACGTCAGTAACTAGATTTTTTCGTATGGAAAAAATAGCAAATCA  
CAGTAAAATCTTGTAGCCAGAACAACAGCAGCTGGATCAGTTGGTTCCTC  
GGGATCAAGGGCAACGAGTACCTCTGCCGCGTGCCCATCGACTACATTCA

GGAGACGTTCAACCAGATGGGCCTGGAGTACTTCACCGAGACACTGCAAG  
TGATACTGAATCTGGGGTTCGACAGTTCCTTTGACTGTGTCTTCGGCGAT  
GAGGAGAAGTGGTACGGCTTGATCCCCGCCCAGATACATCATGTCGGAGCG  
AGGCATGCCCCAAAAGTATGAGAGAGGGGACTTCGAAGTGTGTCCAAAGC  
TCTCCTGTAGGCAGAAAGCCCTGCCTGTGGGCCCCAGCGACGTGTGGGTC  
AAGTCCAACGTGAAGATCTTCTGCCCTCGCTGTAACGATACACAGCCGCA  
CCAAAGACACTAGAATAATAAGATGAGTAACGCCATACGATTTTTTGGCA  
CGCGATTTTTTGGACGTGGGCTCTATAGGTGGCTCCAAGCTCTCTCGAGT  
TTTTGTTCGAGAGAGAAAGAGCGGAGAGCGCTACAGCAAACAGCTCTTTT  
CTTCGCATACAGTGACAGCAGACGACTGTATGTGTTACACAGTATGCTCA  
TGCATTGTAAATTTTACAAAATATGCCCTTACCTTAGAACTTTAAATCT  
ATATTATTTTTTATCAATTGGCACCATTGTGAAAAATTCTTGTCTTGCATT  
GCCTTAACGTTATTATTATTTTAATAAATCTTACAAATTGTAATAGACGA  
ATCTATGGCACTATCCAGCCACTTTTTTGGTGAAGGCCAAATTTACTCTC  
TTTCCGCTCGCTTACGCTGGGAGCGTAAGAAATCTAAAAATAGAATTTGC  
TTGCTTGTGTGAGTGGATCC

F39A (3559 bp)

CTCGAGTTGCAGTCTCCATCCGAATCGCAGTACCAAGTCCAGGAGGCTTA  
TCTTTTTTAGACGGCTGCCGACGTGCCGGCGAAATCTTTGGGGCTGGGAAA  
ATGCACTGCCAGTTTTTCCCCCAGGCTGTCCCTTAGGTCCGGTCAGGTTTT  
GCTTCGATTTTTCCGTTTTGAAGCAACGTTCTTCCAAAAGGCAATAAAGT  
GCGCATAAATTTACGCGCGAAATCAATCTGGTAGGTGGAAATTAACCAA  
AAACATCGTGGGAAAAATAACAATATCAAAGTTGCCAGTATTGAATACTCT  
ACAAAATGAATTACATAAAAAATTATTGAATCAAAATTATAATTTTATTAA  
AAATTGAAAGTAATATTTTAACCTTCTACTCGTATAATACAGTTTTATAT  
ATTTAAAGAATACTGTTAAATTTTGAATTAAATTATCATTACATATTTAA  
TGTAAGTCAGGAAAACCTTTTTGGAAGGAGGCCTTTATTA AAAAGTCTT  
TTTTTTTAACATAAATTGGCTATTCCCAAAAAAATTCCAAAGAACTATA  
ATATAATAATAAGTTTTTGCATATGCATAATAAGGTAAAAATATATAATT  
TTTCCCTTTTGGCCACAATTCAATTGGGAATTTATTTACGAGATTAACGA  
GGTACGGCATTCCATAATTGGACGTTCAATTTCAAACGTTCTGGTCAAAAC  
ACTAATTATTTTTTTCAATTCAATTTTAACTATTGGTTTTTTCTGAATAA  
CTTAGCTAAAAACGGTCAGGCAGTTGAAAAAATTCGGTTTTTTACTTTTA  
ATAATATATTTTACGTTTTTAACGAACCTAAGGTGATATAATTTGTTTTTCT  
AATTTTCCGAATTGGCAAAAAATGGCGAAAAACCGAACAGTTTGAACCAT  
GTATTAAGGGCAGGGTAAGGGTATAAGGTGTACGAGTGTATGAGGTGTAT  
TAAGTGTATGAGATGTAAGAGGTGTATAGGTCTATGAGGTGTATAAGGTG  
TATGAGGTGTATGAAGTGTATGAGATGTATGAGGTGTATTAAGTGTATGA  
GGGGTATAAGTAGGTGGTAGCTGGCCATATCAACGCACTGGGGAATGTGT  
TTAATTGCAACAACAAGATATCGTGTGGAGTTAAACATCCAGGTTAATCC  
GGGAAGGAGGAGGCGGACGAGGATCCGATACTCTCGGGCGAGGACTCGCG  
CGAGGAATCGCGCTAATCGAGCGGCTTAAAGGCCGACTCATGCAACCGGA  
ATCCATGGAGACTGCAAGTGCAAGCGCTTTGTGAAGAAAATAACTATACT  
ATACTCGGAGAATTACTTACCGGGGGACGTACTTCTCCACGGGCGGCTGG  
GGTCTCAACATCGGCAGCTCCATGAAGAACAGGTGCGGGAAGCTGGTCCC  
GAACATGGCTCCGTCCAGCTTTGGACGGGATCGCGGCTTGAAGACGTCTC  
TACAGCTTGGACAGTAGATCTTAACCTGTGGAATGGCCCCACTCGTCGCTG  
AGGCCCCACTGGCAGGGCTTTCTGCCCCCTTACAGTAGAACTTCGGACACAC  
TCCGAAGTCCCCCTCTCATACTTCAACGCATATCTTCCACGCCACGCTC

CGTCATAATGTAGTTGGCGTGGATCATGCCGTACAGCTTCTCCTCGTGGT  
CGGAGACCGAGGCCACGGACCTGTGACAGCGGTTCCAGGACCACGTTCA  
GTGTGTCTTCCAAGTACTCCAGCCCCGCCAGTTAGCTGTTTCTTTATAGA  
CTTGATGGCCCCGCGGCAGGACGAACTGTTGCCATTCATCCCACGGACGA  
CATCCAGGTGGCATTCTACTTTAAGGCTCGTGCTCTGGCTACAAGATTTTA  
CTGTGATTGCTATATTTCCACAAGAAAAACCTAGTTACTTACGTGCTCGA  
CATGTTCACTCGTTAAAAATGTAATACAAAGTGCAGTGCGAAATGACAAG  
GGCTATGCCATATGCCATAATGACATCTATGTGTCAAAGTTTCGACAGGG  
CTGTAACACTTAATCGGCCGGGAACCTCGATAACTTTACAATAACCTCAAA  
CTCGTCAAAGCGGCAAGTTCAGCTTTTATATTATTTTATTAATAGTATCC  
AAAGCAATATGTTATAAATCCAGGAATTTTTTAAACATTAATAAACTCAGT  
TATATTACCACTTTTGCTATTGAAATAAAACACAACCTCTGTTTATTTTTTA  
TAATAATACCCTTTACTCGTATAGTAAAAGGCTATACTAGATTTCGTTGTA  
AAGGCGGAAGGAATTGTTTCCGACCATATAAAGTATATATACTCTTGATC  
AGGACCAATAGCCAAATCGAGCTGGCCATGTCCGTCTGTCCCTATGAACG  
TCAAGATCTCAGGTAAAAGCTAAAAGGTTGAGATTCAGCATATAGATTCT  
AGAGACAAAGACGCTGCGCAAGTTTGTGACCCATGTTGCCACGCCCCACA  
CTAAGGTCCTCTCTAACGCCCCACAAACCGCACAAAATTGTCACGCCCCCA  
TTTTTGAAAAATGTGTTGATCTTTTTTTTATATTTTTATTGGTCTTGTA  
TTTTTATCTGATTACCAAGAACACAGTGGCCACGCCCATCCACCAACAAG  
ACGCCCCGAAATGGTCGCGTCCACACTTTTAAACAATTTTAAAAAATGTT  
TCATTATATTCCCCAATATCTATCGATATCTCACAAAAAATGATGATATC  
GATATCGCATCACACTAGTTTACTCCCAATTATCCATACTAACTGTAAAT  
ATTACTTTTTTACGGACTCTTAGACAAATTTTTTTTAAAGAACTAGATTGT  
TAGTACCTTCACATTTTCATATTGCTGGTTGGTTTTCTATAGTACAAAAA  
TATAAATGAAGCCTAGCCAACTACTAATTAACTGTATCTTTATATTTA  
ACTGGCCAAGAACCTCTAGTAACCTGTACAACCTTTTGGCAGAGTACAAA  
TGGCTGAAAGCCGAAGTGGCTACAAATCGCATTTTAATAGCTGGCATGGT  
CAGCGTTTCTGTTCCCTTTTCGCCGTACCCTATGGCTCCTTAAGTGTGAAA  
TTCAACCAGCTACTTGGAACCAAGAGGCAGGGGACTCAACGCAAGCCAAA  
CCTGAAAGCGATCAGGAAAAATGTGGCTGTCAGTAAGTGCAGTGGCTCAT  
AATGACTCGATGCGGCCAAGCTGAAACTGATTTAGCTATGGGATAGGAAA  
TGCTATTTGGGCATGGCTGTCGATATCATTAGACGCGGATATCACGTAAT  
GCCCAGAAAGTTTATACAGTGTAGAATAGAATATGCCATAACTTTATAAA  
GAAACATAATTATGGATTTAAGTAATTTAAAAGACCCCTAAATAATTTGT  
ACTCTGCATAAATGCTAGACTAATGGTAAACATATCATAATTTTAAATG  
AAAAAATTTAGCACAAAGGAATCCATCCACATAACGTGTGTAGTTGGTAA  
ACAAGACGAACGGCTGAAAATGTTCAACTGGCGTACCGGTATAATGGCGC  
AACCGTGCGAGGGAAAAATCGACGCGGCGCGCATCAAAATGCGATAGCGG  
GGAGAATTC

***D. sechellia***

crysec3 (382bp)

TTTCCAAAAGTGTTTTCCTGACTTTACATTAAATATGTAATAATAATTTA  
ATTCCAAATTTAACAGTATTCTTTAAATATATAAACTGTATTATACGAG  
TAGAAGGTTAAATATTACTTTCAATTTTTTAAAAAATTATAATTTTGAT  
TCAATCATTTTTATGTAATTCATTTTGTAGAGTATTCAATACTGGCAACT  
TTGATATTGTTATTTTCCCACGATGTTTTTGGTTAATTTCCAACCTACCA  
GATTGATTTTCGCGCGTAAATTTATGCGCACTTTATTGCCTTTTTTGAAGA

ACGTTGCTTCAAAACGGAAAAATCCGAAGCAAAACCTGACCGGACCTAAGG  
GACAGCCTGGGGGAAAACCTGGCAGTGCATTT

***D. mauritiana***

crymau3 (389 bp)

TTTCCAAAAGTGTTTTCTGACTTTACATTAAATATGTAATGATAATTTA  
ATTCCAAATTTAACAGTATTCTTTAAATATACAAATATACAAAACCTGTAT  
TATACGAGTAGAAGGTTAAATATTACNTTTCAATTTTAAATAAAATTAT  
AATTTTGATTCAATCATTTTTATGTAATTCATTTTGTAGAGTATTCAATA  
CTGGCAACTTTGATATTGTCTTTTTCCCACGATGTTTTTGGTTAATTTCC  
AACCTACCAGATTGATTTTCGCGCGTAAATTTATGCGCACTTTATTGCCTT  
TTTGGAAGAACGTTGCTTCAAAACGGAAAAATCGAAGCAAAACCTGACCGG  
ACCTAAGGGACAGCCTGGGGGAAAACCTGGCAGTGCATTT

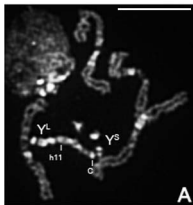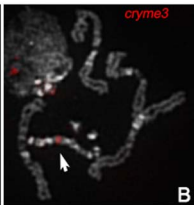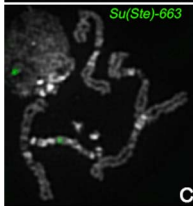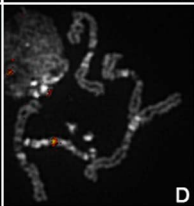







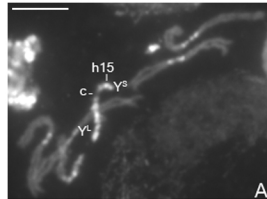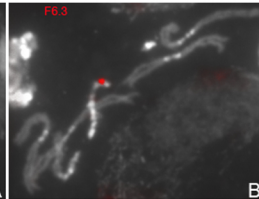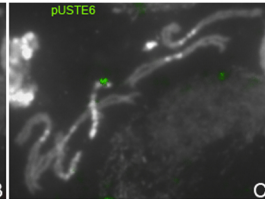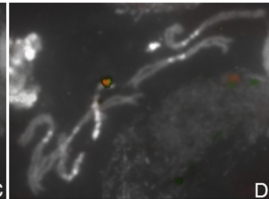



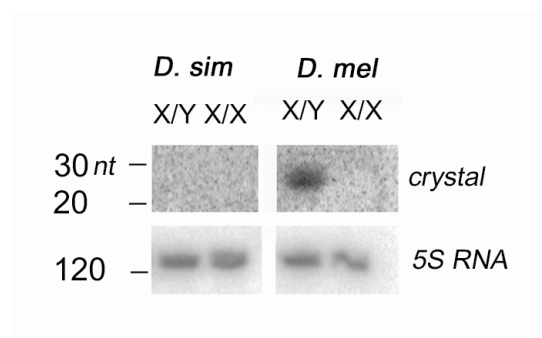



## Supplementary Materials:

Figure S1. Sequences of the clones obtained from the indicated *Drosophila* species.

Figure S2. FISH of the cryme3 and *Su(Ste)*-specific 663 probes on mitotic chromosomes of *D. melanogaster*.

Localization by fluorescence in *situ* hybridization of cryme3-Cy2 labeled (red)(B) and *Su(Ste)*-specific 663-FluorX labeled (green) (C), on mitotic chromosomes of *D. melanogaster*, stained with DAPI. Both probes map in the h11 region of Y chromosome; (D) a merge of the two hybridization patterns; the yellow signal on the merged figure indicates the co-localization of the two probes. Centromere (c). Scale bar indicates 5  $\mu$ m.

Figure S3. Multialignment of the F6.3 sequence, *Ste*, *her<sup>Ste</sup>*, *Su(Ste)*, *PCKR* and the sequences of *D. melanogaster* genome obtained using the BLAT algorithm on the UCSC Genome Browser (<https://genome.ucsc.edu/cgi-bin/hgBlat> accessed on 28 October 2022).

Figure S4. FISH of the F6.3 and pUSTE6 probes on mitotic chromosomes of *D. simulans*.

Localization by fluorescence in *situ* hybridization of F6.3-Cy2 labeled (red)(B) and pUSTE6-FluorX labeled (green) (C), on mitotic chromosomes of *D. simulans*, stained with DAPI. Both signals are in the h15 region of the Y chromosome; (D) a merge of the two hybridization patterns; the yellow signal on the merged figure indicates the co-localization of the two probes. Only the strong hybridization signal is shown. Centromere (c). Scale bar indicates 5  $\mu$ m.

Figure S5. piRNA detection by Northern Blot analysis. Enriched small RNA extracts from testes and ovaries of the indicated genotypes, hybridized with the oligonucleotide named crystal. 5S RNA was used as a loading control.

Table S1. Sequence similarity between the F6.3 sequence and the orthologous sequences of *D. melanogaster*.



## Ok.matrix.identity.F6.3\_output\_

| Sequence                     | Identity vs F6.3 (%) |
|------------------------------|----------------------|
| F6.3/1-471                   | 100                  |
| dmel.X_Ste_1/1-711           | 71                   |
| dmel.Contig5_hetSte./1-699   | 71                   |
| dmel.Y_SuSte_scaffol/1-702   | 68                   |
| dmel.Y_PCKR_scaffold/1-539   | 70                   |
| chrUn_DS483780v1:334/258-593 | 76                   |
| chrUn_DS483780v1:362/314-664 | 75                   |
| chrY:1123325-1123659/1-335   | 79                   |
| chrUn_DS485490v1:316/1-333   | 78                   |
| chrY_DS483875v1_rand/1-297   | 69                   |
| chrX:14046769-140469/1-223   | 75                   |
| chrX:14048008-140482/1-223   | 75                   |
| chrX:14059431-140596/1-223   | 75                   |
| chrX:14049277-140494/1-223   | 75                   |
| chrX:14053084-140533/1-223   | 75                   |
| chrX:14055623-140558/1-223   | 75                   |
| chrX:14056892-140571/1-223   | 75                   |
| chrX:14050546-140507/1-223   | 74                   |
| chrX:14060699-140609/1-223   | 74                   |
| chrX:14054354-140545/1-223   | 75                   |
| chrUn_DS485610v1:270/1-223   | 75                   |
| chrX:14051815-140520/1-223   | 74                   |
| chrX:14058161-140583/1-223   | 74                   |
| chrX_DS483995v1_rand/1-205   | 75                   |
| chrX_DS485049v1_rand/1-190   | 75                   |
| chrX:23316759-233169/1-147   | 78                   |
| chrY:1039612-1039767/1-156   | 80                   |
| chr2R:24499551-24499/1-151   | 75                   |
| chrUn_DS483780v1:348/1-123   | 71                   |
| chrUn_DS485490v1:699/1-141   | 75                   |
| chrY:866508-866586/1-79      | 84                   |
| chrY:872386-872466/1-81      | 84                   |
| chrUn_DS483780v1:394/1-170   | 82                   |
| chrY_CP007109v1_rand/1-187   | 62                   |
| chrY_CP007116v1_rand/1-83    | 74                   |
| chrY:1030334-1030380/1-47    | 76                   |
| chrY:1042347-1042396/1-50    | 84                   |
| chrY:2549479-2549528/1-50    | 82                   |
| chrY:2574779-2574856/1-78    | 71                   |
| chrY:2586154-2586231/1-78    | 71                   |
| chrY:2591504-2591581/1-78    | 71                   |
| chrX:23352202-233522/1-38    | 94                   |
